# Supplementary material for: Managing conflicting ethical concerns in modern small animal practice—A comparative study of veterinarian’s decision ethics in Austria, Denmark and the UK
Source: PubMed Central journal article supplement (PMC8213188; doi:10.1371/journal.pone.0253420), 2021-06-18
Supplement: pone.0253420.s002.pdf [file pone.0253420.s002.pdf]

**S1 Table:**

*Socio-demographic and practice-specific factors for the whole study population and each sub-population from Austria, Denmark and the UK*

|                                                          | All countries<br>(N=615-648) | Austria<br>(n=95-102) | Denmark<br>(n=161-172) | United<br>Kingdom<br>(n=357-374) | Tests                                                                                                                                                                                               |
|----------------------------------------------------------|------------------------------|-----------------------|------------------------|----------------------------------|-----------------------------------------------------------------------------------------------------------------------------------------------------------------------------------------------------|
| <b>GENDER</b>                                            |                              |                       |                        |                                  |                                                                                                                                                                                                     |
| Male                                                     | 181 (28.1)                   | 25 (24.8)             | 43 (25.0)              | 113 (30.5)                       | $\chi^2(2)=2.466, p=0.291$                                                                                                                                                                          |
| Female                                                   | 462 (71.9)                   | 76 (75.2)             | 129 (75.0)             | 257 (69.5)                       |                                                                                                                                                                                                     |
| <b>AGE (in years)   Mean±Std.</b>                        |                              |                       |                        |                                  |                                                                                                                                                                                                     |
|                                                          | 44.7±12.5                    | 45.8±9.3              | 45.5±12.2              | 44.0±13.4                        |                                                                                                                                                                                                     |
| <b>AGE (in years)   Median [IQR]</b>                     |                              |                       |                        |                                  |                                                                                                                                                                                                     |
|                                                          | 45 [33;54]                   | 46 [38;53]            | 46 [33;55]             | 44 [32;54]                       |                                                                                                                                                                                                     |
| <b>AGE (in years)</b>                                    |                              |                       |                        |                                  |                                                                                                                                                                                                     |
| 23-29                                                    | 88 (14.3)                    | 5 (5.3)               | 16 (9.9)               | 67 (18.7)                        | $H(2)=5.430, p=0.066$                                                                                                                                                                               |
| 30-39                                                    | 144 (23.4)                   | 21 (22.1)             | 40 (24.8)              | 83 (23.1)                        |                                                                                                                                                                                                     |
| 40-49                                                    | 147 (23.9)                   | 27 (28.4)             | 40 (24.8)              | 80 (22.3)                        |                                                                                                                                                                                                     |
| 50-59                                                    | 162 (26.3)                   | 38 (40.0)             | 42 (26.1)              | 82 (22.8)                        |                                                                                                                                                                                                     |
| ≥ 60                                                     | 74 (12.0)                    | 4 (4.2)               | 23 (14.3)              | 47 (13.1)                        |                                                                                                                                                                                                     |
| <b>WORK EXPERIENCE (in years)</b>                        |                              |                       |                        |                                  |                                                                                                                                                                                                     |
| 0.5-5                                                    | 137 (21.3)                   | 11 (11.0)             | 39 (22.9)              | 87 (23.3)                        | $H(2)=0.967, p=0.617$                                                                                                                                                                               |
| 6-10                                                     | 69 (10.7)                    | 14 (14.0)             | 19 (11.2)              | 36 (9.7)                         |                                                                                                                                                                                                     |
| 11-20                                                    | 135 (21.0)                   | 29 (29.0)             | 32 (18.8)              | 74 (19.8)                        |                                                                                                                                                                                                     |
| ≥21                                                      | 302 (47.0)                   | 46 (46.0)             | 80 (47.1)              | 176 (47.2)                       |                                                                                                                                                                                                     |
| <b>BUSINESS TYPE</b>                                     |                              |                       |                        |                                  |                                                                                                                                                                                                     |
| Independently owned                                      | 374 (57.7)                   | 97 (95.1)             | 131 (76.2)             | 146 (39.0)                       | $\chi^2(4)=139.912, p<0.001$<br>AT vs. DK: $\chi^2(1)=14.430, p<0.001^a, \phi=.236$<br>AT vs. UK: $\chi^2(1)=91.324, p<0.001^a, \phi=.459$<br>DK vs. UK: $\chi^2(1)=65.459, p<0.001^a, \phi=.364$   |
| Corporate owned                                          | 218 (33.6)                   | 2 (2.0)               | 28 (16.3)              | 188 (50.3)                       |                                                                                                                                                                                                     |
| Other <sup>b</sup> (incl. university and shelter)        | 56 (8.6)                     | 3 (2.9)               | 13 (7.6)               | 40 (10.7)                        |                                                                                                                                                                                                     |
| <b>EMPLOYMENT STATUS</b>                                 |                              |                       |                        |                                  |                                                                                                                                                                                                     |
| Self-employed                                            | 229 (35.4)                   | 81 (79.4)             | 63 (36.6)              | 85 (22.8)                        | $\chi^2(4)= 113.079, p<0.001$<br>AT vs. DK: $\chi^2(1)=46.230, p<0.001^a, \phi=.415$<br>AT vs. UK: $\chi^2(1)=108.329, p<0.001^a, \phi=.486$<br>DK vs. UK: $\chi^2(1)=10.577, p<0.001^a, \phi=.142$ |
| Employed                                                 | 397 (61.4)                   | 20 (19.6)             | 105 (61.0)             | 272 (72.9)                       |                                                                                                                                                                                                     |
| Other <sup>b</sup> (retired and unspecified)             | 21 (3.2)                     | 1 (1.0)               | 4 (2.3)                | 16 (4.3)                         |                                                                                                                                                                                                     |
| <b>INVOLVEMENT DAILY MANAGEMENT</b>                      |                              |                       |                        |                                  |                                                                                                                                                                                                     |
| Yes                                                      | 422 (65.2)                   | 93 (91.2)             | 95 (55.2)              | 234 (62.7)                       | $\chi^2(2)= 38.877, p<0.001, \phi= 0.245$<br>AT vs. DK: $\chi^2(1)=38.413, p<0.001^a, \phi=.374$<br>AT vs. UK: $\chi^2(1)=30.207, p<0.001^a, \phi=.252$<br>DK vs. UK: $\chi^2(1)=2.769, p=0.096$    |
| No                                                       | 225 (34.8)                   | 9 (8.8)               | 77 (44.8)              | 139 (37.3)                       |                                                                                                                                                                                                     |
| <b>INCOME DEPENDENT ON INCOME OF THE PRACTICE/CLINIC</b> |                              |                       |                        |                                  |                                                                                                                                                                                                     |
| Yes                                                      | 432 (66.8)                   | 79 (78.2)             | 78 (45.3)              | 275 (73.5)                       | $\chi^2(2)= 49.238, p<0.001, \phi= 0.276$<br>AT vs. DK: $\chi^2(1)=28.134, p<0.001^a, \phi=.321$<br>AT vs. UK: $\chi^2(1)=0.921, p=0.337$<br>DK vs. UK: $\chi^2(1)=40.097, p<0.001^a, \phi=.274$    |
| No                                                       | 215 (33.2)                   | 22 (21.8)             | 94 (54.7)              | 99 (26.5)                        |                                                                                                                                                                                                     |
| <b>PERMISSION TO DISCOUNT FEES</b>                       |                              |                       |                        |                                  |                                                                                                                                                                                                     |
| Yes                                                      | 461 (71.5)                   | 94 (92.2)             | 150 (87.7)             | 217 (58.3)                       | $\chi^2(2)= 75.039, p<0.001, \phi= 0.341$<br>AT vs. DK: $\chi^2(1)=1.325, p=0.250$<br>AT vs. UK: $\chi^2(1)=40.589, p<0.001^a, \phi= 0.293$<br>DK vs. UK: $\chi^2(1)=46.179, p<0.001^a, \phi=.292$  |
| No                                                       | 184 (28.59)                  | 8 (7.8)               | 21 (12.3)              | 155 (41.7)                       |                                                                                                                                                                                                     |
| <b>POST-GRADUATE QUALIFICATION</b>                       |                              |                       |                        |                                  |                                                                                                                                                                                                     |
| More clinical <sup>1</sup>                               | 79 (12.6)                    | 7 (7.2)               | 41 (24.6)              | 31 (8.5)                         | $\chi^2(4)= 43.949, p<0.001$<br>AT vs. DK: $\chi^2(2)=27.726, p<0.001^a, \phi=.324$<br>AT vs. UK: $\chi^2(2)=4.985, p=0.083$<br>DK vs. UK: $\chi^2(2)=31.155, p<0.001^a, \phi=.242$                 |
| More academic and other <sup>2</sup>                     | 195 (31.0)                   | 44 (45.4)             | 30 (18.0)              | 121 (33.2)                       |                                                                                                                                                                                                     |
| No <sup>3</sup>                                          | 355 (56.4)                   | 46 (47.4)             | 96 (57.5)              | 213 (58.4)                       |                                                                                                                                                                                                     |

Counts (percentage)

<sup>a</sup> Bonferroni correction was applied for multiple comparison between three countries and significant variables

<sup>b</sup> Answer option "Other" were excluded from bivariate statistics

<sup>1</sup>AT: Fachtierarzt, Diplomate (e.g. European or American College); DK: Fagdyrlæge/Øjenpanel dyrlæge/eller anden tilsvarende efter-videreuddannelse; Master i familiedyrsvidenskab, Dansk specialdyrlæge godkendt af Fødevarerstyrelsen; EBVS eller ABVS Diplomater; UK: Diplomate (e.g. European or American College); Masters

<sup>2</sup>AT: Doctor of veterinary medicine, PhD, Masters, other; DK: PhD, other UK: PhD, other;

<sup>3</sup>AT+DK+UK: I did not undertake any further qualification
