# Supplementary material for: Managing conflicting ethical concerns in modern small animal practice—A comparative study of veterinarian’s decision ethics in Austria, Denmark and the UK
Source: PubMed Central journal article supplement (PMC8213188; doi:10.1371/journal.pone.0253420), 2021-06-18
Supplement: pone.0253420.s003.pdf [file pone.0253420.s003.pdf]

**S2 Table: Decision ethics orientations scores across socio-demographic and practice-specific factors by countries**

|                                              | Client-empathetic      |                         |                           | Development-oriented   |                         |                         | Patient-focused        |                         |                         | Client-devolved           |                                                  |                                                                |
|----------------------------------------------|------------------------|-------------------------|---------------------------|------------------------|-------------------------|-------------------------|------------------------|-------------------------|-------------------------|---------------------------|--------------------------------------------------|----------------------------------------------------------------|
|                                              | Austria                | Denmark                 | UK                        | Austria                | Denmark                 | UK                      | Austria                | Denmark                 | UK                      | Austria                   | Denmark                                          | UK                                                             |
| <b>GENDER</b>                                |                        |                         |                           |                        |                         |                         |                        |                         |                         |                           |                                                  |                                                                |
| Male                                         | 5.45±1.16              | 6.00±0.79               | 6.03±0.78                 | 5.05±0.90              | 5.32±1.18               | 4.84±0.95               | 5.40±0.646             | 5.38±0.98               | 5.45±0.88               | 4.39±1.07                 | 4.98±1.14                                        | 4.72±1.19                                                      |
| Female                                       | 5.48±1.08              | 6.18±0.61               | 6.03±0.75                 | 5.21±1.03              | 5.32±0.08               | 4.48±0.96               | 5.56±0.842             | 5.50±0.90               | 5.37±0.86               | 4.45±1.27                 | 4.87±0.94                                        | 5.00±0.96                                                      |
| <i>p-value*</i>                              | t(99)=-0.124, p=0.901  | t(170)=-1.595, p=0.113  | t(386)=-0.061, p=0.951    | t(99)=-0.663, p=0.509  | t(99)=0.000, p=1.00     | t(368)=3.210, p=0.001   | t(99)=-0.876, p=0.383  | t(170)=-0.759, p=0.449  | t(368)0.853, p=0.395    | t(99)=-0.231, p=0.818     | t(170)=-0.606, p=0.545                           | t(368)=-2.44, p=0.015                                          |
| <b>AGE (in years)</b>                        |                        |                         |                           |                        |                         |                         |                        |                         |                         |                           |                                                  |                                                                |
| 23-29                                        | 4.93±2.13              | 5.96±0.73               | 5.95±0.80                 | 5.93±0.28              | 5.54±0.70               | 4.72±0.97               | 5.80±0.80              | 5.42±0.80               | 5.57±0.73               | 4.87±1.12                 | 4.98±0.95                                        | 5.20±0.87                                                      |
| 30-39                                        | 5.57±0.84              | 6.23±0.60               | 5.86±0.87                 | 5.21±1.17              | 5.51±0.89               | 4.54±0.93               | 5.43±0.97              | 5.58±0.82               | 5.29±0.91               | 4.89±1.21                 | 4.86±0.95                                        | 4.97±0.96                                                      |
| 40-49                                        | 5.33±1.17              | 6.21±0.63               | 6.08±0.78                 | 5.11±0.98              | 5.54±0.99               | 4.57±1.03               | 5.38±0.75              | 5.36±0.85               | 5.29±0.83               | 4.67±1.04                 | 4.98±0.97                                        | 4.97±0.96                                                      |
| 50-59                                        | 5.48±1.08              | 5.99±0.76               | 6.07±0.64                 | 5.07±1.01              | 4.98±1.06               | 4.38±0.95               | 5.60±0.72              | 5.54±0.85               | 5.39±0.85               | 3.98±1.30                 | 4.81±1.01                                        | 4.89±0.99                                                      |
| ≥ 60                                         | 6.33±0.82              | 6.02±0.55               | 6.22±0.65                 | 5.17±0.88              | 5.06±0.97               | 4.82±0.94               | 6.25±1.07              | 5.19±1.23               | 5.45±1.06               | 4.50±0.89                 | 4.91±1.11                                        | 4.44±1.42                                                      |
| <i>p-value**</i>                             | F(4,90)=1.029, p=0.397 | F(4,156)=1.177, p=0.323 | F(4,354)=2.078, p=0.083   | F(4,90)=0.826, p=0.512 | F(4,156)=2.413, p=0.051 | F(4,354)=1.972, p=0.098 | F(4,90)=1.315, p=0.510 | F(4,156)=0.868, p=0.458 | F(4,354)=1.331, p=0.258 | F(4,14.03)=2.061, p=0.140 | F(4,156)=0.186, p=0.946                          | F(4,160.7)=2.962, p=0.021, p=0.084 <sup>a</sup>                |
| <b>WORK EXPERIENCE (in years)</b>            |                        |                         |                           |                        |                         |                         |                        |                         |                         |                           |                                                  |                                                                |
| 0.5-5                                        | 5.36±1.54              | 6.08±0.64               | 5.97±0.86                 | 5.79±0.72              | 5.56±0.88               | 4.72±0.98               | 5.64±0.86              | 5.43±0.70               | 5.55±0.70               | 4.45±1.04                 | 4.87±0.89                                        | 5.22±0.85                                                      |
| 6-10                                         | 5.76±0.59              | 6.26±0.63               | 5.69±0.94                 | 4.79±1.22              | 5.23±0.85               | 4.42±0.94               | 5.10±0.96              | 5.84±0.99               | 5.30±1.08               | 5.12±1.19                 | 4.86±0.96                                        | 4.89±0.93                                                      |
| 11-20                                        | 5.18±1.18              | 6.16±0.69               | 6.09±0.67                 | 5.21±0.97              | 5.35±1.12               | 4.59±0.95               | 5.59±0.72              | 5.40±0.82               | 5.32±0.87               | 4.6±1.14                  | 4.84±1.12                                        | 4.95±0.99                                                      |
| ≥21                                          | 5.59±1.02              | 6.11±0.67               | 6.10±0.68                 | 5.04±0.95              | 5.21±0.99               | 4.52±0.98               | 5.59±0.76              | 5.43±1.03               | 5.37±0.89               | 4.12±1.22                 | 4.94±1.01                                        | 4.76±1.15                                                      |
| <i>p-value**</i>                             | F(3,96)=1.228, p=0.304 | F(3,166)=0.375, p=0.771 | F(3,117.3)=2.452, p=0.067 | F(3,96)=2.435, p=0.069 | F(3,166)=1.168, p=0.323 | F(3,369)=1.137, p=0.334 | F(3,96)=1.594, p=0.196 | F(3,166)=1.187, p=0.316 | F(3,369)=1.287, p=0.186 | F(3,32.01)=2.756, p=0.058 | F(3,166)=0.091, p=0.965                          | F(3,128.80)=4.451, p=0.005 <sup>a</sup> , p=0.015 <sup>a</sup> |
| <b>BUSINESS TYPE</b>                         |                        |                         |                           |                        |                         |                         |                        |                         |                         |                           |                                                  |                                                                |
| Independently                                | 5.47±1.10              | 6.14±0.72               | 6.08±0.67                 | 5.16±0.99              | 5.33±0.95               | 4.60±0.97               | 5.52±0.79              | 5.46±0.90               | 5.53±0.85               | 4.38±1.21                 | 4.90±1.02                                        | 4.87±1.12                                                      |
| Corporate                                    | 4.67±0.47              | 6.08±0.53               | 6.00±0.83                 | 4.17±1.18              | 5.13±1.11               | 4.63±0.98               | 5.83±1.18              | 5.24±0.97               | 5.31±0.88               | 4.50±0.24                 | 4.94±0.86                                        | 5.05±0.97                                                      |
| Other (incl. uni and shelter)                | 1.00±0.67              | 6.15±0.48               | 5.93±0.74                 | 5.67±0.89              | 5.61±0.92               | 4.27±0.89               | 5.33±1.15              | 6.00±0.83               | 5.27±0.82               | 5.89±0.19                 | 4.74±1.06                                        | 4.48±0.94                                                      |
| <i>p-value* (other excluded from t-test)</i> | t(97)=1.028, p=0.307   | t(157)=0.429, p=0.668   | t(332)=0.865, p=0.388     | t(97)=1.398, p=0.165   | t(157)=0.966, p=0.355   | t(332)=-0.258, p=0.797  | t(97)=-0.556, p=0.579  | t(157)=1.191, p=0.235   | t(332)=2.349, p=0.019   | t(97)=-0.137, p=0.891     | t(157)=-0.180, p=0.857                           | t(332)=-1.600, p=0.111                                         |
| <b>EMPLOYMENT TYPE</b>                       |                        |                         |                           |                        |                         |                         |                        |                         |                         |                           |                                                  |                                                                |
| Self-employed                                | 5.45±1.05              | 6.12±0.76               | 5.95±0.86                 | 5.05±0.96              | 5.30±0.93               | 4.60±0.98               | 5.53±0.71              | 5.49±0.96               | 5.39±0.99               | 4.28±1.23                 | 4.84±1.07                                        | 4.82±1.16                                                      |
| Employed                                     | 5.50±1.27              | 6.14±0.60               | 6.04±0.74                 | 5.52±1.08              | 5.30±1.00               | 4.57±0.98               | 5.40±1.04              | 5.45±0.90               | 5.40±0.82               | 4.98±1.01                 | 4.91±0.95                                        | 4.96±1.00                                                      |
| <i>p-value</i>                               | t(99)=-0.166, p=0.869  | t(166)=-0.114, p=0.909  | t(355)=-0.934, p=0.351    | t(99)=-1.886, p=0.062  | t(166)=0.000, p=1.00    | t(355)=0.299, p=0.765   | t(99)=0.667, p=0.507   | t(166)=0.270, p=0.787   | t(355)=-0.123, p=0.902  | t(99)=-2.373, p=0.020     | t(166)=-0.493, p=0.623                           | t(355)=-1.036, p=0.301                                         |
| <b>POST-GRADUATE QUALIFICATION</b>           |                        |                         |                           |                        |                         |                         |                        |                         |                         |                           |                                                  |                                                                |
| Clinical <sup>1</sup>                        | 5.62±1.18              | 6.02±0.69               | 6.01±0.88                 | 5.19±1.33              | 5.28±1.15               | 4.58±1.11               | 5.76±0.71              | 5.61±1.03               | 5.44±0.79               | 3.67±0.96                 | 5.24±0.93                                        | 4.84±1.25                                                      |
| Academic <sup>2</sup>                        | 5.42±1.00              | 6.33±0.09               | 6.15±0.65                 | 5.11±0.77              | 5.40±1.06               | 4.69±0.94               | 5.58±0.71              | 5.54±0.82               | 5.40±0.89               | 4.47±1.20                 | 4.59±1.11                                        | 4.83±1.01                                                      |
| No <sup>3</sup>                              | 5.58±1.17              | 6.10±0.68               | 5.96±0.78                 | 5.18±1.16              | 5.26±0.86               | 4.50±0.95               | 5.48±0.82              | 5.39±0.89               | 5.37±0.88               | 4.59±1.25                 | 4.89±0.95                                        | 4.97±1.03                                                      |
| <i>p-value**</i>                             | F(2,94)=0.275, p=0.760 | F(2,164)=2.073, p=0.129 | F(2,362)=2.445, p=0.088   | F(2,94)=0.055, p=0.946 | F(2,164)=0.239, p=0.787 | F(2,362)=1.470, p=0.231 | F(2,94)=0.510, p=0.602 | F(2,164)=0.928, p=0.398 | F(2,362)=0.104, p=0.901 | F(2,94)=1.791, p=0.172    | F(2,65.135)=3.669, p=0.031, p=0.062 <sup>a</sup> | F(2,362)=0.741, p=0.477                                        |

*\*from independent t-test; \*\*from F-test; Post hoc analysis: <sup>a</sup>Client-devolved UK: "0.5-5 years experiences" vs. "≥20 years experiences": d=0.45, p=.002; <sup>1</sup>AT: Fachtierarzt, Diplomate; DK: Fagdyrlæge/Øjenpanel dyrlæge/eller anden tilsvarende efter-videreuddannelse; Master i familiedyrvidenskab, Dansk specialdyrlæge godkendt af Fødevarestyrelsen; EBVS eller ABVS Diplomant; UK: Diploma (e.g. RCVS, European or American College); Masters; <sup>2</sup>AT: Doctor of veterinary medicine, PhD, Masters, other; DK: PhD, other UK: PhD, other; <sup>3</sup>AT+DK+UK: I did not undertake any further qualification; <sup>a</sup>p-values after Bonferroni correction*
